# Supplementary material
Source: MDPI journal article supplement (https://www.mdpi.com/2077-0472/10/12/588)
Supplement: s1 [file s1]

## Supplementary material S1

The household-level survey's primary purpose was to document the current socioeconomic conditions and farming practices engaged by farmers. Later, this information was further synthesized to estimate the livelihood sustainability index

Eight local survey takers were trained to apply the questionnaire and follow the data collection procedure. We interviewed the heads of households or their spouses, decision-makers, and the people most familiar with household duties and productive activities. The interviewed households had to fill out a consent protocol. The survey data were collected using Android tablet devices CSPro 6.2 and 6.3 (U.S. Census Bureau 2020).

**Table S1. Household-level survey structure**

| Module                                      | Contents                                                                                                                                                                           |
|---------------------------------------------|------------------------------------------------------------------------------------------------------------------------------------------------------------------------------------|
| General data                                | ID, municipality, date                                                                                                                                                             |
| Sociodemographic                            | Age, sex, relationship, education level, occupations, migration                                                                                                                    |
| Household information                       | Health system, ethnic group<br>Roof, floor, and wall material; electric power; source of drinkable water; type of home ownership; access roads; means of transportation            |
| House characteristics                       |                                                                                                                                                                                    |
| Assets                                      | Household and productive assets                                                                                                                                                    |
| Subjective well-being                       | Perception of well-being<br>Household Dietary Diversity Score (HDDS); Latin American and Caribbean Household Food Security Measurement Scale (ELCSA); Months of Adequate Household |
| Food security                               | Food Provisioning (MAHFP)<br>Agricultural and livestock activities, natural resource                                                                                               |
| Productive activities and natural resources | extraction, conflicts                                                                                                                                                              |
| Associativity                               | Affiliation with organizations, training, information                                                                                                                              |
| Off-farm income                             | Off-farm activities, income, subsidy                                                                                                                                               |
| Farm characteristics                        | Type of farm ownership, land use, crops                                                                                                                                            |
| Pastures                                    | Type of pastures, area                                                                                                                                                             |
| Cattle ranching                             | Cattle and poultry information                                                                                                                                                     |
| Climate change perceptions                  | Shocks and climate change perceptions, coping strategies                                                                                                                           |

**Figure S1- Methodological process for the Sustainability index-estimation.**

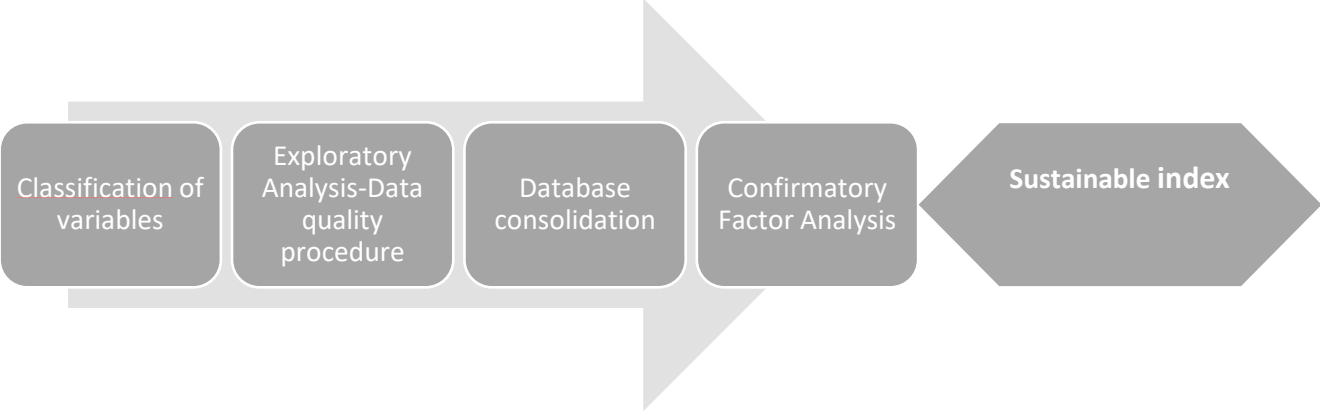

**Supplementary material S2- Goodness of fit for the structural equation model.**

The model was adjusted to the target criteria and therefore we obtained well-founded indices that come from the theoretic framework (Table S2). We can therefore make inferences based on the estimation. Overall, statistical results show that our SI has high internal validity.

**Table S2. Summary of the model fit information used to calculate the SLF indices.**

| Fit indices                                     | Production system      |       |                                |       |
|-------------------------------------------------|------------------------|-------|--------------------------------|-------|
|                                                 | Cattle ranching system |       | Small-scale family agriculture |       |
|                                                 | Acceptance value       | Value | Acceptance value               | Value |
| <b>Overall model fit (<math>\chi^2</math>)</b>  |                        |       |                                |       |
| Chi-square                                      | P-value >0.05          | 0.022 | P-value >0.05                  | 0.022 |
| <b>Incremental fit indices</b>                  |                        |       |                                |       |
| Comparative fit index (CFI)                     | $\geq 0.95$            | 0.962 | $\geq 0.95$                    | 0.962 |
| Tucker-Lewis index (TLI)                        | $\geq 0.95$            | 0.954 | $\geq 0.95$                    | 0.954 |
| <b>Residual-based indices</b>                   |                        |       |                                |       |
| Root mean square error of approximation (RMSEA) | <0.08                  | 0.038 | <0.08                          | 0.038 |

Note: We included only the statistically significant paths.
